# Supplementary material for: Serum Amyloid A3 is required for normal lung development and survival following influenza infection
Source: PubMed Central journal article supplement (PMC6224415; doi:10.1038/s41598-018-34901-x), 2018-11-08
Supplement: 41598_2018_34901_MOESM1_ESM.pdf [file 41598_2018_34901_MOESM1_ESM.pdf]

## **Serum Amyloid A3 is required for normal lung development and survival following influenza infection**

Jennifer L. Ather<sup>1</sup>, Oliver Dienz<sup>2</sup>, Jonathan E. Boyson<sup>2</sup>, Vikas Anathy<sup>3</sup>, Eyal Amiel<sup>4</sup>, and Matthew E. Poynter<sup>1\*</sup>

Vermont Lung Center, Division of Pulmonary Disease and Critical Care, Department of Medicine<sup>1</sup>, Department of Surgery<sup>2</sup>, Department of Pathology and Laboratory Medicine<sup>3</sup>, and Department of Biomedical and Health Sciences<sup>4</sup>, University of Vermont, Burlington, VT 05405

\*Corresponding author: Matthew E. Poynter  
University of Vermont  
Given E410A, 89 Beaumont Ave.  
Burlington, VT 05405  
802-656-8045  
[Matthew.Poynter@uvm.edu](mailto:Matthew.Poynter@uvm.edu)

# Supplemental Figure 1

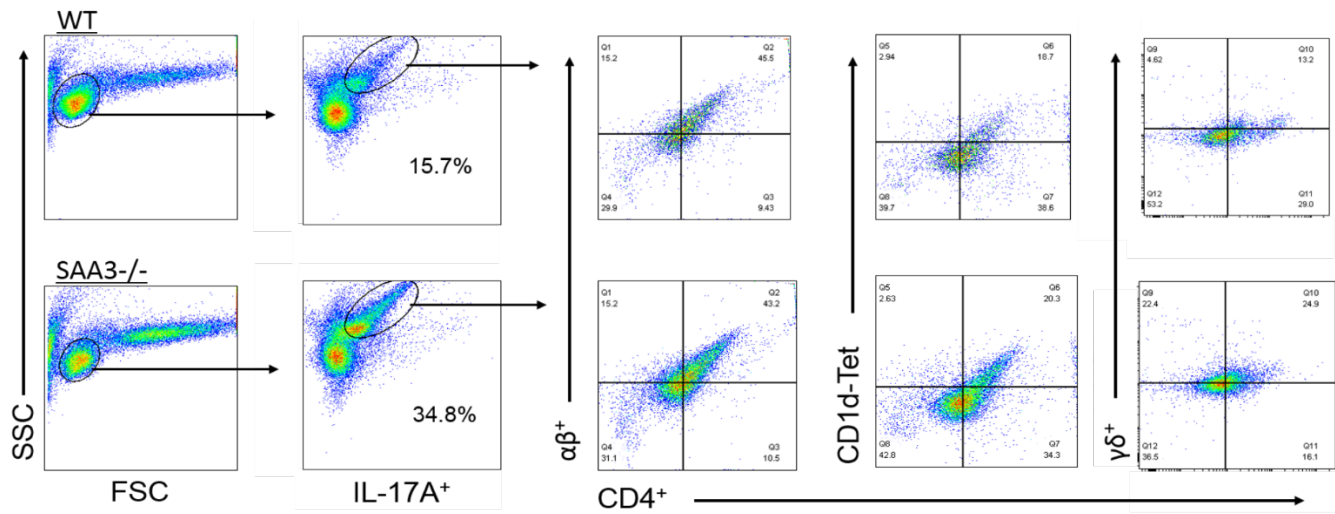

*Supplemental Figure 1. Gating scheme for flow cytometry analysis of cultured CD4<sup>+</sup> T cells from wild type and SAA3<sup>-/-</sup> mice. Following 96-hour polyclonal stimulation with αCD3/αCD28, CD4<sup>+</sup> T cells were collected and analyzed by flow cytometry. Cells were first gated on a FSC/SSC-Lo population that corresponds to lymphocyte size and granularity. Lymphocytes were then gated upon intracellular expression of IL-17A. The lymphocytes IL-17A<sup>+</sup> populations were then characterized for co-expression of CD4 with TCRαβ, TCRγδ, or CD1d-tetramer (an NKT cell marker).*
